# Supplementary material for: Targeting Wnt/β-Catenin Signaling Exacerbates Ferroptosis and Increases the Efficacy of Melanoma Immunotherapy via the Regulation of MITF
Source: MDPI journal article supplement (doi:10.3390/cells11223580), 2022-11-12
Supplement: s1 [file s1]

Supplementary Material

1. Supplementary Tables

1.1 Supplementary Table S1: Sequence information for primers.

Supplementary Table S1. Sequence information for primers (5' to 3').

|                  |                                                                                     |
|------------------|-------------------------------------------------------------------------------------|
| <i>Axin2</i>     | Forward Primer: CAAACTTTGCGCCAACCGTGGTTG<br>Reverse Primer: GGTGCAAAGACATAGCCAGAACC |
| <i>Cyclin D1</i> | Forward Primer: CCTCTGTGCCACAGATG<br>Reverse primer: GGGTCACACTTGATCACTC            |
| <i>Myc</i>       | Forward Primer: CCTGGTGCTCCATGAGGAGAC<br>Reverse Primer: CAGACTCTGACCTTTTGCCAGG     |
| <i>MITF</i>      | Forward Primer: GGCTTGATGGATCCTGCTTTGC<br>Reverse Primer: GAAGGTTGGCTGGACAGGAGTT    |
| <i>PGC1α</i>     | Forward Primer: GGCAGTAGATCCTCTTCAAGATC<br>Reverse Primer: TCACACGGCGCTCTTCAATTG    |
| <i>SCD1</i>      | Forward Primer: AAACCTGGCTTGCTGATG<br>Reverse Primer: GGGGGCTAATGTTCTTGTC A         |
| <i>SOD2</i>      | Forward Primer: CTGGACAAACCTCAGCCCTAAC<br>Reverse Primer: AACCTGAGCCTTGGACACCAAC    |
| <i>CAT</i>       | Forward Primer: GACAATCAGGGTGGTGCTCC<br>Reverse Primer: GAATCGCATTCTTAGGCTTCTC      |

|               |                                                                                     |
|---------------|-------------------------------------------------------------------------------------|
| <i>TRX2</i>   | Forward Primer: GTCCACACCACTGTGCGTGG<br>Reverse Primer: TTGCAGGGAGATGGCTCAGCG       |
| <i>TXNRD2</i> | Forward Primer: GCACCTTTGACACCGTCCTGTG<br>Reverse Primer: CACCAGGATCTTCTGAGTGTCG    |
| <i>Prx5</i>   | Forward Primer: CCAATCAAGGTGGGAGATGCC<br>Reverse Primer: GCAGGTGTGTCTTGGAACATC      |
| <i>Prx3</i>   | Forward Primer: CCTTTGGATTTACCTTTGTGTG<br>Reverse Primer: CAAACCACCATTCTTTCTTGGTG   |
| <i>COX IV</i> | Forward Primer: ACGAGCTCATGAAAGTGTTGTG<br>Reverse Primer: AATGCGATACAACCTCGACTTTCTC |
| <i>ACTB</i>   | Forward Primer: TCATGAAGTGTGACGTGGACATC<br>Reverse Primer: CAGGAGGAGCAATGATCTTGATCT |

*1.2 Supplementary Table S2: Differentially-expressed molecules in RNA-sequencing data*

## **2. Supplementary Figure**

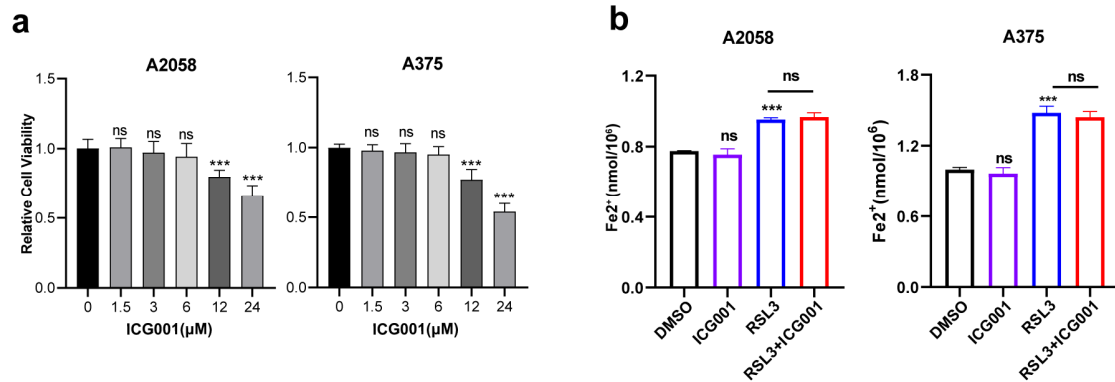

**Supplementary Figure S1.** (a) Relative cell viability of A2058 and A375 cell lines after the treatment with different concentrations of ICG001. (b) The intracellular level of Fe<sup>2+</sup> in both A2058 and A375 cell lines after indicated treatment. Data represent the mean ± SEM of triplicates. *P* value was calculated by two-tailed Student's *t*-test. \*\*\**P* < 0.001. ns, non-significant.
